# Supplementary material
Source: publisher figshare collection journal article supplement (https://frontiersin.figshare.com/ndownloader/files/24931952)
Supplement: Supplementary file 1 [file 24931952]

**Supplementary Table S4.** Half-month averages ± the standard deviations (SDs) of the microbial autotrophic biomasses (mg C m-3) in the surface waters of the station sampled. Total autotrophic biomass, AB; *Synechococcus*,SYN; autotrophic picoflagellates, APF; autotrophic nanoflagellates, ANF; Diatoms, Diatoms; autotrophic dinoflagellates, ADF; autotrophic microflagelllates, AMF; and autotrophic ciliates, AC, n = 3-5.

| Month | AB | SYN | APF | ANF | Diatoms | ADF | AMF | AC |
| --- | --- | --- | --- | --- | --- | --- | --- | --- |
| January | 56 ± 19 | 0.7 ± 1.1 | 1.8 ± 1.0 | 32 ± 11 | 2 ± 1 | 3.4 ± 2.7 | 11.8 ± 9.9 | 4.3 ± 4.6 |
| January | 91 ± 43 | 3.8 ± 1.1 | 6.5 ± 2.6 | 62 ± 32 | 10 ± 9 | 1.1 ± 1.0 | 5.6 ± 4.5 | 1.5 ± 1.8 |
| February | 105 ± 26 | 0.9 ± 0.2 | 3.2 ± 0.4 | 57 ± 14 | 37 ± 37 | 2.0 ± 1.0 | 2.3 ± 2.4 | 2.7 ± 3.7 |
| February | 123 ± 49 | 1.6 ± 0.8 | 8.3 ± 2.9 | 84 ± 25 | 16 ± 7 | 5.1 ± 7.7 | 6.0 ± 9.0 | 2.0 ± 3.2 |
| March | 111 ± 47 | 0.3 ± 0.2 | 3.0 ± 1.9 | 50 ± 19 | 41 ± 32 | 11.3 ± 14.1 | 2.7 ± 2.6 | 2.8 ± 2.6 |
| March | 182 ± 166 | 1.0 ± 0.04 | 13.6 ± 14.5 | 92 ± 88 | 48 ± 28 | 13.0 ± 15.6 | 13.2 ± 17.1 | 1.9 ± 2.3 |
| April | 248 ± 113 | 0.8 ± 0.9 | 5.3 ± 8.1 | 70 ± 25 | 158 ± 102 | 12.0 ± 10.3 | 1.8 ± 1.8 | 0.0 ± 0.0 |
| April | 187 ± 114 | 0.1 ± 0.04 | 1.6 ± 1.5 | 57 ± 40 | 112 ± 106 | 3.6 ± 2.7 | 9.1 ± 4.5 | 2.6 ± 3.3 |
| May | 298 ± 212 | 0.1 ± 0.1 | 4.0 ± 5.1 | 28 ± 29 | 253 ± 230 | 1.5 ± 2.1 | 10.9 ± 17.3 | 0.2 ± 0.4 |
| May | 404 ± 291 | 0.2 ± 0.3 | 4.3 ± 4.4 | 58 ± 42 | 307 ± 315 | 3.1 ± 4.1 | 30.1 ± 59.6 | 0.6 ± 0.4 |
| June | 293 ± 122 | 1.0 ± 1.4 | 5.4 ± 3.3 | 118 ± 151 | 98 ± 73 | 59.9 ± 47.8 | 2.1 ± 1.2 | 8.3 ± 4.3 |
| June | 302 ± 105 | 2.2 ± 1.0 | 19.7 ± 7.5 | 156 ± 48 | 104 ± 59 | 10.6 ± 8.4 | 8.1 ± 5.3 | 0.1 ± 0.2 |
| July | 515 ± 350 | 0.9 ± 0.2 | 17.2 ± 13.5 | 159 ± 172 | 300 ± 197 | 19.0 ± 27.4 | 11.6 ± 10.7 | 7.2 ± 15.4 |
| July | 306 ± 125 | 2.3 ± 1.4 | 22.2 ± 3.4 | 142 ± 50 | 72 ± 87 | 57.0 ± 67.5 | 9.5 ± 3.1 | 0.6 ± 0.9 |
| August | 401 ± 310 | 7.5 ± 3.9 | 23.2 ± 15.1 | 133 ± 62 | 197 ± 279 | 28.9 ± 20.0 | 9.2 ± 1.7 | 1.1 ± 1.6 |
| August | 287 ± 143 | 1.9 ± 0.8 | 7.5 ± 5.0 | 45 ± 23 | 79 ± 84 | 74.6 ± 110.1 | 11.2 ± 9.7 | 67.0 ± 70.8 |
| September | 925 ± 545 | 13.4 ± 6.8 | 14.3 ± 4.5 | 172 ± 71 | 153 ± 176 | 463.4 ± 578.2 | 90.4 ± 37.0 | 18.1 ± 16.7 |
| September | 889 ± 127 | 7.8 ± 5.2 | 13.5 ± 5.8 | 128 ± 90 | 589 ± 189 | 22.0 ± 4.5 | 117.7 ± 86.0 | 10.8 ± 8.7 |
| October | 220 ± 186 | 1.0 ± 1.3 | 1.5 ± 1.7 | 19 ± 22 | 171 ± 171 | 8.4 ± 14.5 | 9.8 ± 10.8 | 9.6 ± 17.0 |
| October | 149 ± 200 | 1.7 ± 3.2 | 1.7 ± 1.7 | 16 ± 10 | 122 ± 202 | 4.5 ± 7.1 | 0.5 ± 0.4 | 3.3 ± 2.8 |
| November | 74 ± 45 | 2.0 ± 2.4 | 5.0 ± 6.3 | 33 ± 25 | 19 ± 29 | 5.0 ± 7.0 | 0.2 ± 0.2 | 8.9 ± 15.0 |
| November | 57 ± 14 | 3.3 ± 2.6 | 7.0 ± 5.6 | 42 ± 21 | 1 ± 1 | 0.9 ± 0.8 | 0.2 ± 0.1 | 2.4 ± 2.0 |
| December | 89 ± 29 | 10.5 ± 8.8 | 13.6 ± 5.9 | 61 ± 15 | 2 ± 1 | 0.5 ± 0.4 | 1.7 ± 1.7 | 0.3 ± 0.3 |
| December | 104 ± 23 | 12.9 ± 7.9 | 14.3 ± 3.6 | 67±16 | 5 ± 5 | 1.3 ± 0.2 | 3.8 ± 1.5 | 0.6 ± 0.5 |
